# Supplementary material for: dynamAedes: a unified modelling framework for invasive Aedes mosquitoes
Source: Springer Nature journal article supplement (doi:10.1186/s13071-022-05414-4), 2022-11-08
Supplement: MOESM1 [file 13071_2022_5414_MOESM1_ESM.pdf]

# Supplementary Materials

## dynamAedes: a unified modelling framework for invasive *Aedes* mosquitoes

Daniele Da Re<sup>1,\*</sup>, Wim Van Bortel<sup>2</sup>, Friederike Reuss<sup>3,4</sup>,  
Ruth Müller<sup>2</sup>, Sebastien Boyer<sup>5</sup>, Fabrizio Montarsi<sup>6</sup>,  
Silvia Ciocchetta<sup>7</sup>, Daniele Arnoldi<sup>8</sup>, Giovanni Marini<sup>8</sup>,  
Annapaola Rizzoli<sup>8</sup>, Gregory L'Amber<sup>9</sup>,  
Guillaume Lacour<sup>10</sup>, Constantianus J.M. Koenraadt<sup>11</sup>,  
Sophie O. Vanwambeke<sup>1</sup>, Matteo Marcantonio<sup>12,\*</sup>

14th August 2022

<sup>1</sup> Georges Lemaître Center for Earth and Climate Research, Earth and Life Institute, UCLouvain, Louvain-la-Neuve, Belgium

<sup>2</sup> Unit Entomology and the Outbreak Research Team, Tropical Medicine Institute, Antwerp, Belgium

<sup>3</sup> Senckenberg Biodiversity and Climate Research Centre, Frankfurt am Main, Germany

<sup>4</sup> Institute of Occupational, Social and Environmental Medicine, Goethe University, Frankfurt am Main, Germany

<sup>5</sup> Medical and Veterinary Entomology Unit, Institute Pasteur du Cambodge, Cambodia

<sup>6</sup> Laboratory of Parasitology, National reference centre/OIE collaborating centre for diseases at the animal-human interface, Istituto Zooprofilattico Sperimentale delle Venezie, Legnaro, Italy

<sup>7</sup> The University of Queensland, School of Veterinary Science, Gatton, Australia

<sup>8</sup> Research and Innovation Centre, Fondazione Edmund Mach, San Michele all'Adige, Trento, Italy

<sup>9</sup> EID Méditerranée, Direction Technique, Montpellier, France

<sup>10</sup> Altopictus, Pérols, France

<sup>11</sup> Wageningen University & Research, Department of Plant Sciences, Laboratory of Entomology, Wageningen, The Netherlands.

<sup>12</sup> Evolutionary Ecology and Genetics Group, Earth and Life Institute, UCLouvain, Louvain-la-Neuve, Belgium

\* corresponding author: [daniele.dare@uclouvain.be](mailto:daniele.dare@uclouvain.be); [matteo.marcantonio@uclouvain.be](mailto:matteo.marcantonio@uclouvain.be)

# Contents

|          |                                                                                 |           |
|----------|---------------------------------------------------------------------------------|-----------|
| <b>1</b> | <b>Review of mechanistic model for invasive <i>Aedes</i></b>                    | <b>4</b>  |
| <b>2</b> | <b>Parameters used in dynamAedes</b>                                            | <b>6</b>  |
| <b>3</b> | <b>Model core equations</b>                                                     | <b>12</b> |
| <b>4</b> | <b><i>Aedes sp.</i> response curve</b>                                          | <b>14</b> |
| <b>5</b> | <b>Juvenile-habitat water volume parameter sensitivity</b>                      | <b>20</b> |
| <b>6</b> | <b><i>Aedes aegypti</i> and <i>Ae. albopictus</i> regional scale case study</b> | <b>21</b> |
| <b>7</b> | <b><i>Aedes koreicus</i> population dynamics punctual scale case study</b>      | <b>22</b> |

# **1 Review of mechanistic model for invasive *Aedes***

| Name          | Year       | Parameterized for (species)                                     | Dispersal | Programming language         | Reference                   |
|---------------|------------|-----------------------------------------------------------------|-----------|------------------------------|-----------------------------|
| CIMSiM        | 1993       | <i>Ae. aegypti</i>                                              | No        | Visual Basic                 | Focks et al. (1993b,a)      |
| SkeeterBuster | 2009       | <i>Ae. aegypti</i>                                              | No        | C++                          | Magori et al. (2009)        |
| stagePop      | 2009       | Generic                                                         | No        | R                            | Kettle and Nutter (2015)    |
| ALBORUN       | 2011       | <i>Ae. albopictus</i>                                           | No        | C++                          | Poletti et al. (2011)       |
|               | 2013, 2019 | <i>Ae. albopictus</i>                                           | No        | Ocelet                       | Tran et al. (2013, 2020)    |
|               | 2018       | Generic                                                         | No        | C++, R, Python               | ?                           |
|               | 2019       | <i>Ae. albopictus</i>                                           | No        | C++, R, Python               | Erguler et al. (2016, 2017) |
|               | 2019       | <i>Ae. albopictus</i>                                           | No        | Octave v4.2.1, Runge-Kutta 4 | Metelmann et al. (2019)     |
| ARBOCARTO     | 2019       | <i>Ae. koreicus</i>                                             | No        | R                            | Marini et al. (2019b)       |
|               | 2019       | <i>Ae. albopictus, Ae. aegypti</i>                              | No        | Ocelet                       | Tran and Demarchi (2019)    |
|               | 2020       | <i>Ae. aegypti</i>                                              | No        | R                            | Iwamura et al. (2020)       |
|               | 2020       | <i>Ae. koreicus</i>                                             | No        | R                            | Kurucz et al. (2020)        |
|               | 2020       | <i>Ae. albopictus</i>                                           | No        | R                            | Pasquali et al. (2020)      |
| ALBOMAUURICE  | 2021       | <i>Ae. aegypti</i>                                              | Yes       | R                            | Da Re et al. (2021)         |
|               | 2021       | <i>Ae. albopictus</i>                                           | No        | Ocelet                       | Iyaloo et al. (2021)        |
|               | 2022       | <i>Ae. japonicus</i>                                            | Yes       | R                            | Kerkow et al. (2022)        |
| dynamAedes    | 2022       | <i>Ae. aegypti, Ae. albopictus, Ae. japonicus, Ae. koreicus</i> | Yes       | R                            | This study                  |

Table 1: Description of mechanistic models for invasive *Aedes* available as software or scripts (online or on request).

## **2 Parameters used in dynamAedes**

| Species                                         | Stage     | Parameters                                   | Main source                                                                           | data | Origin                                   | Value                   | Comments                                                                                                                                                                   |
|-------------------------------------------------|-----------|----------------------------------------------|---------------------------------------------------------------------------------------|------|------------------------------------------|-------------------------|----------------------------------------------------------------------------------------------------------------------------------------------------------------------------|
| <i>Ae. aegypti</i><br>and <i>Ae. albopictus</i> | Eggs      | min number of days for eggs development      | Christophers (1960); Delatte et al. (2008)                                            |      | Literature therein; Reunion (France)     | La 4                    |                                                                                                                                                                            |
| <i>Ae. aegypti</i><br>and <i>Ae. albopictus</i> | Juveniles | min number of days for imma-ture development | Christophers (1960); Delatte et al. (2008)                                            |      | Literature therein; Reunion (France)     | La 6                    |                                                                                                                                                                            |
| <i>Ae. aegypti</i><br>and <i>Ae. albopictus</i> | Adults    | min number of days for gonotrophic cycle     | Christophers (1960); Delatte et al. (2008)                                            |      | Literature therein; Reunion (France)     | La 4                    |                                                                                                                                                                            |
| <i>Ae. koreicus</i><br>and <i>Ae. japonicus</i> | Eggs      | min number of days for eggs development      | Dr Daniele Arnoldi unpublished results for <i>Ae. koreicus</i>                        |      | Trento (NE Italy)                        | 8                       |                                                                                                                                                                            |
| <i>Ae. koreicus</i><br>and <i>Ae. japonicus</i> | Juveniles | min number of days for imma-ture development | Dr Daniele Arnoldi unpublished results for <i>Ae. koreicus</i> ; Wieser et al. (2019) |      | Trento (NE Italy), Biberach (SW Germany) | 9                       | min 10 days for <i>Ae. koreicus</i> , min 8 days for <i>Ae. japonicus</i> . Assumed 9 for both species                                                                     |
| <i>Ae. koreicus</i><br>and <i>Ae. japonicus</i> | Adults    | min number of days for gonotrophic cycle     | Assumed the same of <i>Ae. aegypti</i>                                                |      | -                                        | 4                       | Since the probability of complete the gonothropic cycle is roughly 1/3 of <i>Ae. aegypti</i> , we kept the same length of <i>Ae. aegypti</i>                               |
| <i>All species</i>                              | Juveniles | Survival rate (density-dependent)            | Hancock et al. (2016)                                                                 |      | Tropical (NE Australia)                  | Log-normal distribution | 1-density dependant survival rate is additive to 1-temperature-dependent survival rate; the estimates made for <i>Ae. aegypti</i> were extended to the other three species |
|                                                 | Adults    | Sex ratio 1:1                                | -                                                                                     |      | -                                        | -                       | General modelling assumption widely taken in process-based modelling literature                                                                                            |

Table 2: Other model features

| Species               | Stage                                 | Model parameter                       | Data source                                                            | Origin                                                               | Function                              | Comments                                                                                                                                                                                                                                         |
|-----------------------|---------------------------------------|---------------------------------------|------------------------------------------------------------------------|----------------------------------------------------------------------|---------------------------------------|--------------------------------------------------------------------------------------------------------------------------------------------------------------------------------------------------------------------------------------------------|
| <i>Ae. aegypti</i>    | Egg                                   | Survival rate                         | Thomas et al. (2012); Eisen et al. (2014)                              | Laboratory colony( Tropical origin); Asia origin); Literature review | Beta                                  | Data for T>0 taken from Eisen et al. (2014), data for T<0 taken from Thomas et al. (2012)                                                                                                                                                        |
|                       |                                       | Hatching rate                         | Christophers (1960); Farnesi et al. (2009); Mohammed and Chadee (2011) | Literature therein; Rock-feller strain; Trinidad and Tobago          | Beta                                  | 48h estimates from Mohammed and Chadee (2011), divided by two to get a daily rate. Additional data: 0 hatching a 7°C from Christophers (1960) and 0.025 at 12°C daily hatching from Farnesi et al. (2009)                                        |
|                       | Juvenile                              | Survival rate (temperature-dependent) | Yang et al. (2009)                                                     | NW of São Paulo State (Brazil)                                       | Beta                                  | Table 8 from Yang et al. (2009) Appendix1                                                                                                                                                                                                        |
|                       |                                       | Emergence rate                        | Yang et al. (2009); Grech et al. (2015)                                | NW of São Paulo State (Brazil); Cordoba (Argentina)                  | Beta                                  | Data from Yang et al. (2009) refer to all immature stages, we corrected them to match only pupa using information present in Grech et al. (2015) by taking the ratio between the minimum pupation time of the two experiment as a scaling factor |
|                       | Adult                                 | Survival rate                         | Yang et al. (2009)                                                     | NW of São Paulo State (Brazil)                                       | Beta                                  | Table 4                                                                                                                                                                                                                                          |
|                       |                                       | Gonotrophic cycle                     | Yang et al. (2009)                                                     | NW of São Paulo State (Brazil)                                       | Beta                                  | Table 5                                                                                                                                                                                                                                          |
| <i>Ae. albopictus</i> | Egg                                   | Oviposition: number of eggs           | Christophers (1960); Yang et al. (2009)                                | Literature therein; NW of São Paulo State (Brazil)                   | Beta                                  | Table 5 from Yang et al. (2009) rescaled using the average number of eggs/female reported in Christophers (1960).                                                                                                                                |
|                       |                                       | Survival rate (non-diapausing)        | Metelmann et al. (2019); Expert based                                  | Literature therein                                                   | nonlinear                             | Polynomial function taken from the SM manually adapted to get no survival at T>40°C                                                                                                                                                              |
|                       | Survival rate (diapausing)            | Metelmann et al. (2019)               | Literature therein                                                     | nonlinear                                                            | Polynomial function taken from the SM |                                                                                                                                                                                                                                                  |
|                       | Hatching rate ((non-diapausing)       | Delatte et al. (2008)                 | La Reunion (France)                                                    | Beta                                                                 | Table 1; column Egg-L1                |                                                                                                                                                                                                                                                  |
|                       | Hatching rate (diapausing)            | -                                     | -                                                                      | -                                                                    | -                                     | Assumed the same as for non-diapausing eggs                                                                                                                                                                                                      |
|                       | Survival rate (temperature-dependent) | Metelmann et al. (2019)               | Literature therein                                                     | nonlinear                                                            | Polynomial function taken from the SM |                                                                                                                                                                                                                                                  |
| Juvenile              | Emergence rate                        | Delatte et al. (2008)                 | La Reunion (France)                                                    | Beta                                                                 | Table 1; column Pupae-adult           |                                                                                                                                                                                                                                                  |
| Adult                 | Survival rate                         | Metelmann et al. (2019)               | Literature therein                                                     | nonlinear                                                            | Polynomial function taken from the SM |                                                                                                                                                                                                                                                  |
|                       | Gonotrophic cycle                     | Delatte et al. (2008)                 | La Reunion (France)                                                    | Beta                                                                 | Table 6                               |                                                                                                                                                                                                                                                  |



| Species                               | Stage               | Model parameter             | Data source                         | Origin                              | Function           | Comments                                                                                                                                                                                             |                                                                                                                                                                                                                                                                          |
|---------------------------------------|---------------------|-----------------------------|-------------------------------------|-------------------------------------|--------------------|------------------------------------------------------------------------------------------------------------------------------------------------------------------------------------------------------|--------------------------------------------------------------------------------------------------------------------------------------------------------------------------------------------------------------------------------------------------------------------------|
| <i>Ae. japonicus</i>                  | Egg                 | Oviposition: number of eggs | Delatte et al. (2008)               | La Reunion (France)                 | Beta               | Table 6                                                                                                                                                                                              |                                                                                                                                                                                                                                                                          |
|                                       |                     | Survival rate               | Wieser et al. (2019)                | Biberach (Germany)                  | Beta               | Observation taken from Fig. 1 in Wieser et al. (2019)                                                                                                                                                |                                                                                                                                                                                                                                                                          |
|                                       |                     | Hatch rate                  | Wieser et al. (2019)                | Biberach (Germany)                  | Beta               | Reuss et al., unpublished. Hatching observed also below a thin ice layer ( $T < 0$ )                                                                                                                 |                                                                                                                                                                                                                                                                          |
|                                       | Juvenile            | Survival rate               | Wieser et al. (2019)                | Biberach (Germany)                  | Beta               | Reuss et al., unpublished                                                                                                                                                                            |                                                                                                                                                                                                                                                                          |
|                                       |                     | Emergence rate              | Reuss et al. (2018) Suppl. Mat.     | Biberach (Germany)                  | Beta               | Table S2; survival upper temperature limit was adapted by accounting for expert opinion.                                                                                                             |                                                                                                                                                                                                                                                                          |
|                                       | Adult               | Survival rate               | Reuss et al. (2018) Suppl. Mat.     | Biberach (Germany)                  | Beta               | Fig. 2                                                                                                                                                                                               |                                                                                                                                                                                                                                                                          |
|                                       |                     | Gonotrophic cycle           | -                                   | -                                   | Beta               | No information available, assumed the same of <i>Ae. koreicus</i> due to their phylogenetic and biogeographic similarity                                                                             |                                                                                                                                                                                                                                                                          |
|                                       | <i>Ae. koreicus</i> | Egg                         | Oviposition: number of eggs         | Reuss et al. (2018)                 | Biberach (Germany) | Beta                                                                                                                                                                                                 | Number of eggs estimated by mean female wing length, using the formula taken from Armistead et al. (2008), their Fig. 5; we divided the estimated eggs per female per gonotrophic cycle by a factor of two, due the two ovipositing days we are accounting in the model. |
|                                       |                     |                             | Survival rate                       | Marini et al. (2019b); Expert Based | Trento (NE Italy)  | nonlinear                                                                                                                                                                                            | Polynomial function F3 and parameters values taken from Tab. 5 in Marini et al. (2019b) adjusted using observations provided in Arnoldi et al., unpublished observations                                                                                                 |
|                                       |                     | Juvenile                    | Hatching rate                       | Marini et al. (2019b); Expert Based | Trento (NE Italy)  | Beta                                                                                                                                                                                                 | Table 1 scaled with unpublished data to account for non-embryonated eggs; Arnoldi et al., unpublished observations                                                                                                                                                       |
| Survival rate (temperature-dependent) |                     |                             | Marini et al. (2019b); Expert Based | Trento (NE Italy)                   | Beta               | Table 1 averaged from instar 1 to 4; the the upper limit has been adapted accordingly to expert opinions by Ciocchetta et al., unpublished observations and Arnoldi et al., unpublished observations |                                                                                                                                                                                                                                                                          |
| Adult                                 |                     | Emergence rate              | Marini et al. (2019b); Expert Based | Trento (NE Italy)                   | Beta               | Table 2                                                                                                                                                                                              |                                                                                                                                                                                                                                                                          |
|                                       |                     | Survival rate               | Marini et al. (2019b); Expert Based | Trento (NE Italy)                   | Beta               | Table 3                                                                                                                                                                                              |                                                                                                                                                                                                                                                                          |
| Adult                                 |                     | Gonotrophic cycle           | Marini et al. (2019b); Expert Based | Trento (NE Italy)                   | Beta               | Table 3                                                                                                                                                                                              |                                                                                                                                                                                                                                                                          |
|                                       |                     | Oviposition: number of eggs | Marini et al. (2019b); Expert Based | Trento (NE Italy)                   | Beta               | Arnoldi et al., unpublished observations                                                                                                                                                             |                                                                                                                                                                                                                                                                          |

Table 3: Species-specific temperature-dependent physiological parameters

| Species               | Stage       | Parameters                                  | Main source               | Origin                           | Distribution       | Comments                                                                                                                                                          |
|-----------------------|-------------|---------------------------------------------|---------------------------|----------------------------------|--------------------|-------------------------------------------------------------------------------------------------------------------------------------------------------------------|
| <i>Ae. aegypti</i>    | Adults      | Active dispersal                            | Marcantonio et al. (2019) | California (USA)                 | Log-normal         | Table 3                                                                                                                                                           |
| <i>Ae. albopictus</i> | Adults      | Active dispersal                            | Marini et al. (2019a)     | Rome (Italy)                     | Log-normal         | Figure 2a; Data from the 3 MRR were fit with several distributions, best distribution chosen using AIC                                                            |
| <i>Ae. japonicus</i>  | Adults      | Active dispersal                            | -                         | -                                | Log-normal         | No information available, assumed the same of <i>Ae. albopictus</i>                                                                                               |
| <i>Ae. koreicus</i>   | Adults      | Active dispersal                            | -                         | -                                | Log-normal         | No information available, assumed the same of <i>Ae. albopictus</i>                                                                                               |
| All species           | All species | Passive dispersal (average trip distance)   | Pasaoglu et al. (2012)    | -                                | -                  | Trip distance weighted average for ITA, DEU, FRA, ESP, POL, UK. Data taken from Figure 4.4 Average trip distance (km) by trip purpose using WebPlotDigitalizer    |
| All species           | Adults      | Passive dispersal (Hitchhiking probability) | Ertija et al. (2017)      | Mediterranean (Catalonia, Spain) | gamma distribution | 0.0051 probability of a female mosquito to enter a car; Assumed to be the same for all the species as estimated by Ertija et al. (2017) for <i>Ae. albopictus</i> |

Table 4: Species specific dispersal parameters

| Species              | Stage | Model parameter    | Data source          | Origin                               | Function    | Comments                                                                                                                                  |
|----------------------|-------|--------------------|----------------------|--------------------------------------|-------------|-------------------------------------------------------------------------------------------------------------------------------------------|
| <i>Ae. aegypti</i>   | Egg   | Diapause incidence | Lacour et al. (2015) | Ovitrap (Provence, Southern France)  | Exponential |                                                                                                                                           |
| <i>Ae. japonicus</i> | Egg   | Diapause incidence | Krupa et al. (2021)  | Ovitrap (Bas-Rhin, Northeast France) | Exponential |                                                                                                                                           |
| <i>Ae. kor-eicus</i> | Egg   | Diapause incidence | Krupa et al. (2021)  | Ovitrap (Bas-Rhin, Northeast France) | Exponential | We used the same exponential function used for <i>Ae. japonicus</i> due to the close philo-genetic relationship between these two species |

Table 5: Species specific photoperiod parameters

### 3 Model core equations

The core set of equations that determine the size and dynamics of egg ( $E$ ), juvenile ( $J$ ) and adult ( $F$ ) compartments in cell  $s$ , day  $t$  is:

$$E_{s,t} = E_{s,t}^{laid} + E_{s,t}^{survive} - E_{s,t}^{hatch} \quad (1)$$

$$J_{s,t} = E_{s,t}^{hatch} + J_{s,t}^{survive} - J_{s,t}^{emerge} \quad (2)$$

$$F_{s,t} = \frac{J_{s,t}^{emerge}}{2} + F_{s,t}^{survive} \quad (3)$$

The components of equations 2-4 can be synthetically described as:

$$E_{s,t}^{laid} \sim \sum_{F_{s,t}^{lay}} Poisson(\mathbf{R}_E) \quad (4)$$

Where  $\mathbf{R}_E$  is a vector of number of eggs of length  $s$  in day  $t$  derived from a temperature-dependent function.  $F_{s,t}^{lay}$  correspond to adult females which have matured eggs and can lay eggs for 2 days in a row.

$$E_{s,t}^{survive} \sim Binomial(E_{s,t-1}, \mathbf{\Pi}_{Es}) \quad (5)$$

Where  $\mathbf{\Pi}_{Es}$  is a vector of length  $s$  containing the probabilities of egg survival in day  $t$  derived from a temperature-dependent function.

$$E_{s,t}^{hatch} \sim Binomial(E_{s,t-1}^{survive}, \mathbf{\Pi}_{Eh}) \quad (6)$$

Where  $\mathbf{\Pi}_{Eh}$  is a vector of length  $s$  containing the probabilities of egg hatching in day  $t$  derived from a temperature-dependent function.

$$J_{s,t}^{survive} \sim Multinomial(J_{s,t-1}, \mathbf{\Pi}_{Js}) \quad (7)$$

Where  $\mathbf{\Pi}_{Js}$  is a vector of length  $s$  containing the probabilities of juvenile survival in day  $t$  derived from the combination of temperature-dependent and density-dependent functions.

$$J_{s,t}^{emerge} \sim Multinomial(J_{s,t-1}, \mathbf{\Pi}_{Je}) \quad (8)$$

Where  $\mathbf{\Pi}_{Je}$  is a vector of length  $s$  containing the probabilities of adult emergence in day  $t$  derived from a temperature-dependent function.

$$F_{s,t}^{survive} \sim Binomial(F_{s,t-1}, \mathbf{\Pi}_{Fs}) \quad (9)$$

Where  $\mathbf{\Pi}_{Fs}$  is a vector of length  $s$  containing the probabilities of adult survival in day  $t$  derived from a temperature-dependent function.

## 4 *Aedes sp.* response curve

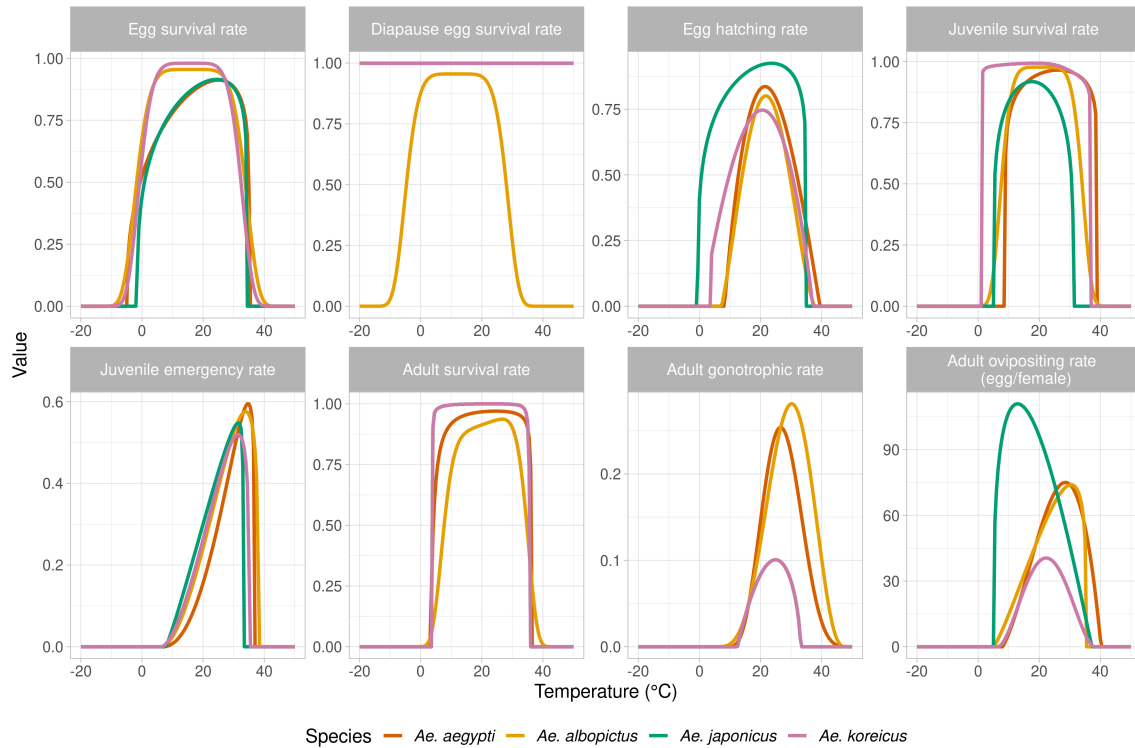

Figure 1: Overview of the temperature-dependent functions used in the model for the four *Aedes* species

*Ae. aegypti* temperature-dependent functions

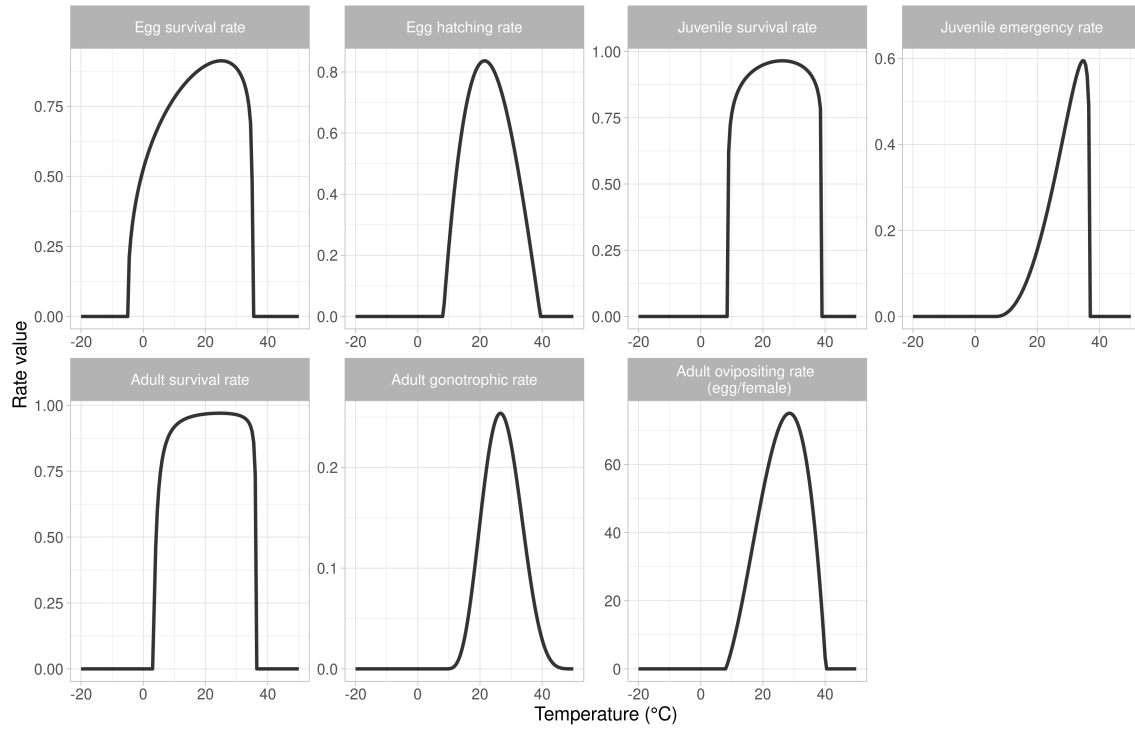

Figure 2: Overview of the temperature-dependent functions used in the model for *Ae. aegypti*

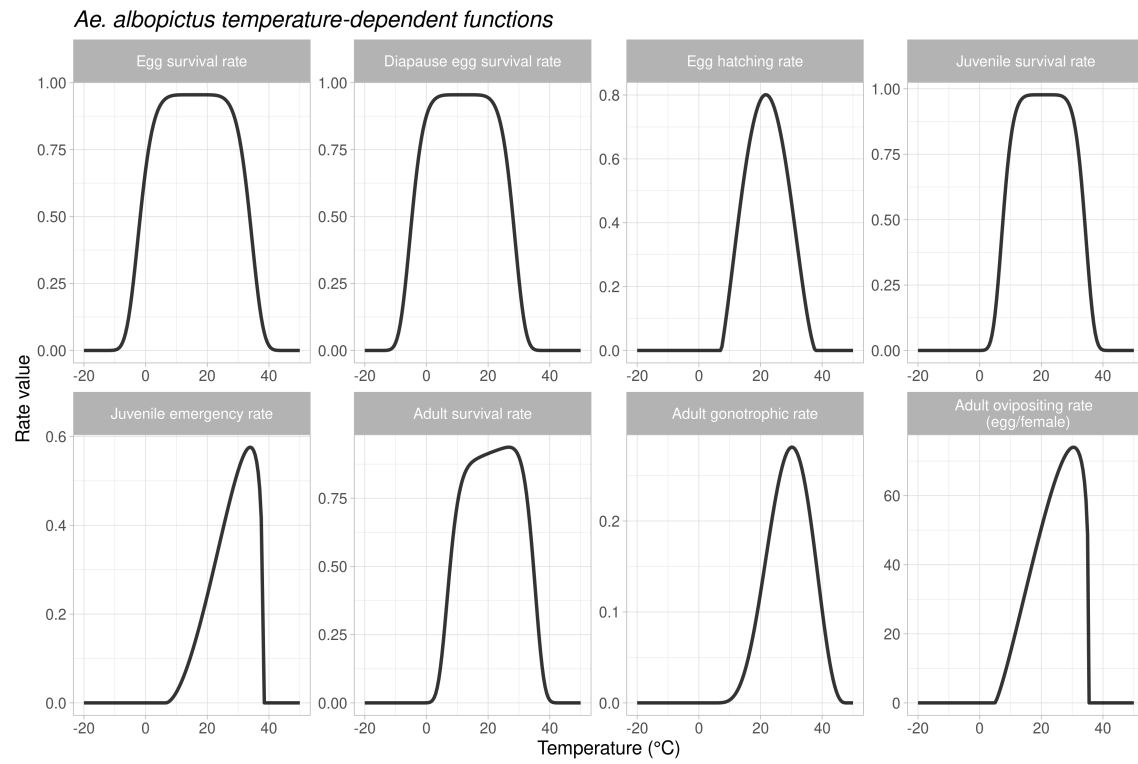

Figure 3: Overview of the temperature-dependent functions used in the model for *Ae. albopictus*



*Ae. japonicus* temperature-dependent functions

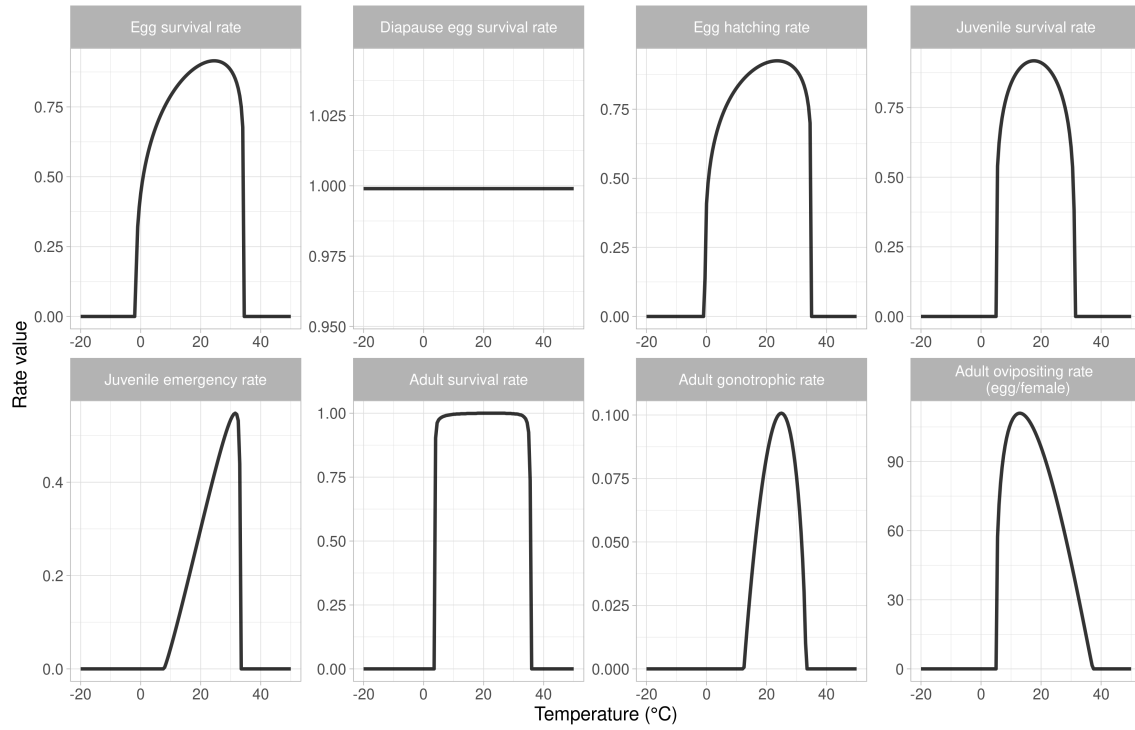

Figure 4: Overview of the temperature-dependent functions used in the model for *Ae. japonicus*

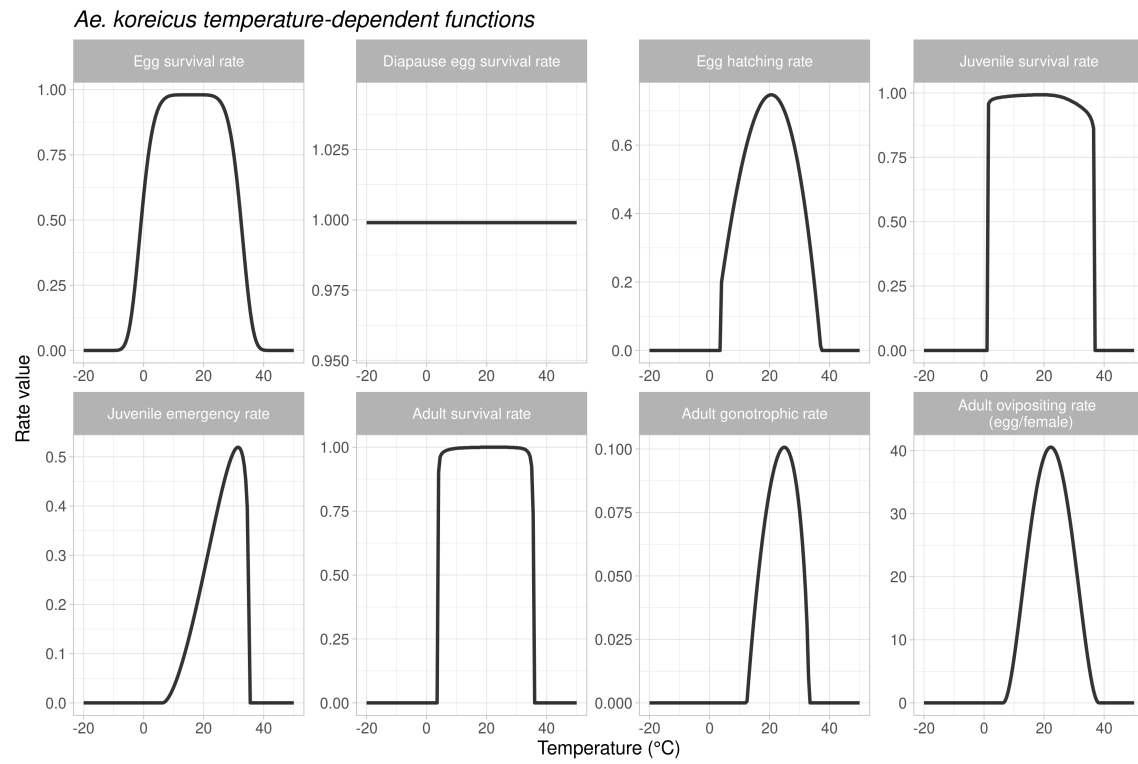

Figure 5: Overview of the temperature-dependent functions used in the model for *Ae. koreicus*

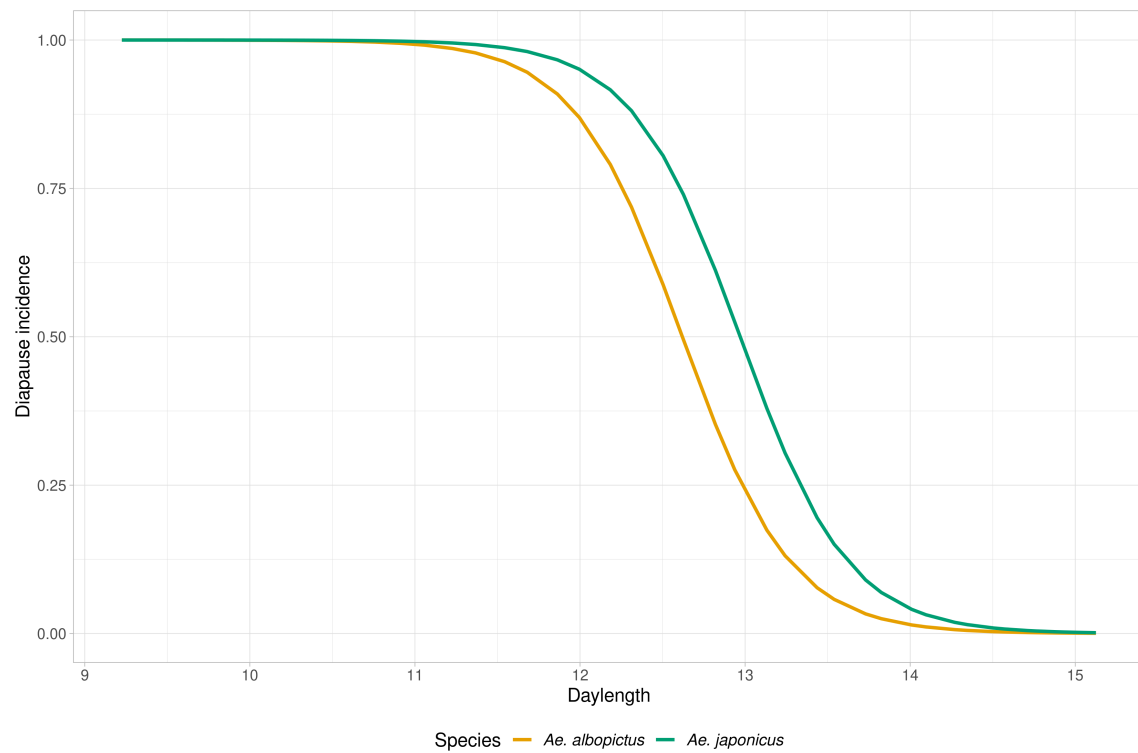

Figure 6: Overview of the photoperiod-dependent diapause incidence function used to in the model for *Ae. albopictus* and *Ae. japonicus*. The *Ae. japonicus* function was used for *Ae. koreicus* as well.

## 5 Juvenile-habitat water volume parameter sensitivity

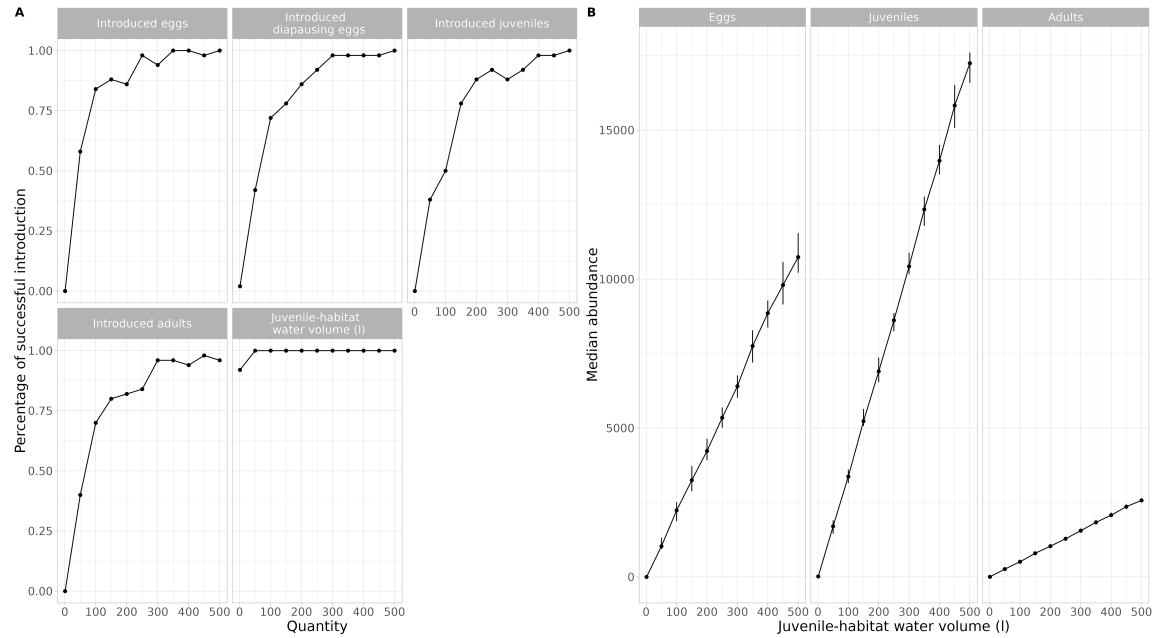

Figure 7: Sensitivity analysis on the effect of A) the variability of introduced propagules and juvenile-habitat water volume on the Percentage of successful introduction, B) the variability of the juvenile-habitat water volume on the median individual abundance.

## 6 *Aedes aegypti* and *Ae. albopictus* regional scale case study

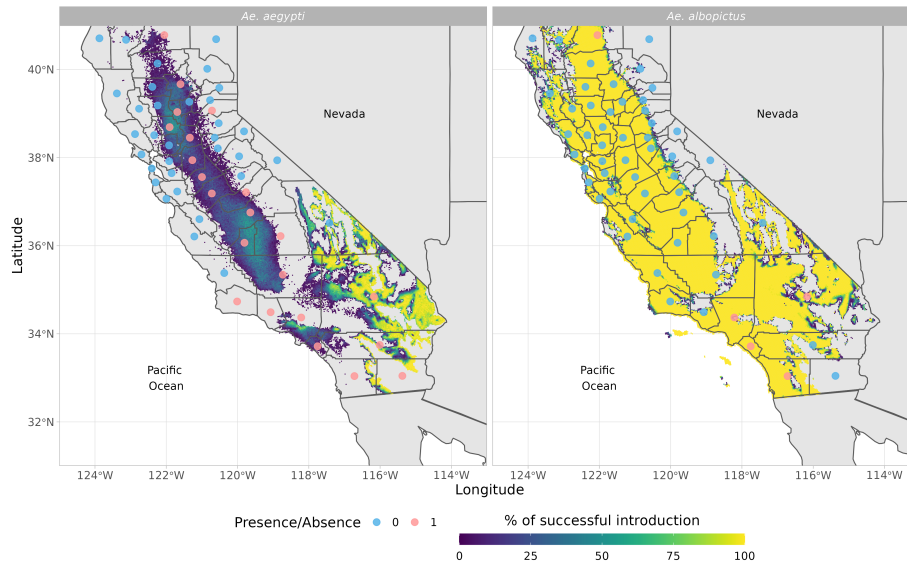

Figure 8: Predicted percentage of establishment of *Ae. aegypti* *Ae. albopictus* in California (USA) for the years 2011-2016 and 2013-2018, respectively. Only pixels having a probability of successful introduction >0 are shown. The red dots represent the counties where the species have been found.

## 7 *Aedes koreicus* population dynamics punctual scale case study

| Year | Month     | CI 2.5% | CI 25% | CI 50% | CI 75% | CI 97.5% | Observed <i>Ae. Koreicus</i> |
|------|-----------|---------|--------|--------|--------|----------|------------------------------|
| 2016 | May       | 0.00    | 1.45   | 5.26   | 13.74  | 31.22    | 2                            |
| 2016 | June      | 0.00    | 1.37   | 6.36   | 14.40  | 40.64    | 5                            |
| 2016 | July      | 0.00    | 2.32   | 11.85  | 32.62  | 101.76   | 3                            |
| 2016 | August    | 0.70    | 24.57  | 66.65  | 128.03 | 266.00   | 9                            |
| 2016 | September | 0.18    | 14.52  | 37.37  | 88.27  | 175.66   | 37                           |
| 2016 | October   | 0.00    | 0.24   | 1.18   | 3.14   | 10.17    | 0                            |
| 2017 | May       | 0.02    | 0.51   | 2.67   | 7.85   | 18.44    | 9                            |
| 2017 | June      | 0.29    | 2.75   | 10.60  | 28.57  | 55.28    | 8                            |
| 2017 | July      | 3.67    | 10.91  | 30.62  | 85.53  | 186.93   | 10                           |
| 2017 | August    | 7.24    | 32.50  | 74.18  | 159.67 | 283.74   | 24                           |
| 2017 | September | 0.61    | 8.79   | 31.48  | 88.08  | 156.47   | 2                            |
| 2017 | October   | 0.08    | 0.82   | 2.20   | 4.98   | 11.06    | 2                            |
| 2017 | November  | 0.00    | 0.00   | 0.00   | 0.00   | 0.14     | 0                            |
| 2018 | April     | 1.66    | 5.26   | 11.54  | 22.25  | 34.30    | 0                            |
| 2018 | May       | 1.73    | 3.22   | 5.73   | 9.18   | 13.21    | 1                            |
| 2018 | June      | 1.57    | 5.81   | 10.52  | 22.29  | 32.89    | 6                            |
| 2018 | July      | 13.74   | 29.99  | 48.04  | 74.34  | 98.01    | 7                            |
| 2018 | August    | 37.83   | 71.67  | 109.27 | 157.55 | 201.00   | 29                           |
| 2018 | September | 54.55   | 82.03  | 112.57 | 147.58 | 179.09   | 24                           |
| 2018 | October   | 2.13    | 2.90   | 3.77   | 5.89   | 7.80     | 6                            |
| 2018 | November  | 0.00    | 0.00   | 0.00   | 0.08   | 0.15     | 0                            |

Table 6: Model validation for *Aedes koreicus* model in Trento (NE Italy)

## References

- Armistead, J., Arias, J., Nishimura, N., and Lounibos, L. (2008). Interspecific larval competition between *Aedes albopictus* and *Aedes japonicus* (Diptera: Culicidae) in Northern Virginia. *Journal of medical entomology*, 45(4):629–637.
- Christophers, S. R. (1960). *Aedes aegypti* (L.) *The Yellow Fever Mosquito: Its Life History, Bionomics and Structure*. Cambridge University Press. Google-Books-ID: TBcf5DTKL1oC.
- Da Re, D., Montecino-Latorre, D., Vanwambeke, S. O., and Marcantonio, M. (2021). Will the yellow fever mosquito colonise Europe? Assessing the re-introduction of *Aedes aegypti* using a process-based population dynamical model. *Ecological Informatics*, 61:101180.
- Delatte, H., Paupy, C., Dehecq, J., Thiria, J., Failloux, A., and Fontenille, D. (2008). *Aedes albopictus*, vecteur des virus du chikungunya et de la dengue à la Réunion : biologie et contrôle. *Parasite*, 15(1):3–13.
- Eisen, L., Monaghan, A. J., Lozano-Fuentes, S., Steinhoff, D. F., Hayden, M. H., and Bieringer, P. E. (2014). The impact of temperature on the bionomics of *Aedes* (*Stegomyia*) *aegypti*, with special reference to the cool geographic range margins. *Journal of medical entomology*, 51(3):496–516.
- Erguler, K., Chandra, N. L., Proestos, Y., Lelieveld, J., Christophides, G. K., and Parham, P. E. (2017). A large-scale stochastic spatiotemporal model for *Aedes albopictus*-borne chikungunya epidemiology. *PloS one*, 12(3):e0174293.
- Erguler, K., Smith-Unna, S. E., Waldock, J., Proestos, Y., Christophides, G. K., Lelieveld, J., and Parham, P. E. (2016). Large-scale modelling of the environmentally-driven population dynamics of temperate *Aedes albopictus* (skuse). *PloS one*, 11(2):e0149282.
- Eritja, R., Palmer, J. R., Roiz, D., Sanpera-Calbet, I., and Bartumeus, F. (2017). Direct evidence of adult *Aedes albopictus* dispersal by car. *Scientific Reports*, 7(1):1–15.
- Farnesi, L. C., Martins, A. J., Valle, D., and Rezende, G. L. (2009). Embryonic development of *aedes aegypti* (diptera: Culicidae): influence of different constant temperatures. *Memórias do Instituto Oswaldo Cruz*, 104:124–126.
- Focks, D., Haile, D., Daniels, E., and Mount, G. (1993a). Dynamic life table model for *Aedes aegypti* (Diptera: Culicidae): simulation results and validation. *Journal of medical entomology*, 30(6):1018–1028.

- Focks, D. A., Haile, D., Daniels, E., and Mount, G. A. (1993b). Dynamic life table model for *Aedes aegypti* (Diptera: Culicidae): analysis of the literature and model development. *Journal of medical entomology*, 30(6):1003–1017.
- Grech, M. G., Sartor, P. D., Almirón, W. R., and Ludueña-Almeida, F. F. (2015). Effect of temperature on life history traits during immature development of *aedes aegypti* and *culex quinquefasciatus* (diptera: Culicidae) from córdoba city, argentina. *Acta tropica*, 146:1–6.
- Hancock, P. A., Linley-White, V., Callahan, A. G., Godfray, H. C. J., Hoffmann, A. A., and Ritchie, S. A. (2016). Density-dependent population dynamics in *Aedes aegypti* slow the spread of wMel *Wolbachia*. *Journal of Applied Ecology*, 53(3):785–793.
- Iwamura, T., Guzman-Holst, A., and Murray, K. A. (2020). Accelerating invasion potential of disease vector *Aedes aegypti* under climate change. *Nature Communications*, 11(1):1–10.
- Iyaloo, D. P., Degenne, P., Elahee, K. B., Seen, D. L., Bheecarry, A., and Tran, A. (2021). Albomaurice: A predictive model for mapping *aedes albopictus* mosquito populations in mauritius. *SoftwareX*, 13:100638.
- Kerkow, A., Wieland, R., Gethmann, J. M., Hölker, F., and Lentz, H. H. (2022). Linking a compartment model for west nile virus with a flight simulator for vector mosquitoes. *Ecological Modelling*, 464:109840.
- Kettle, H. and Nutter, D. (2015). stagePop: modelling stage-structured populations in R. *Methods in Ecology and Evolution*, 6(12):1484–1490. \_eprint: <https://besjournals.onlinelibrary.wiley.com/doi/pdf/10.1111/2041-210X.12445>.
- Krupa, E., Henon, N., and Mathieu, B. (2021). Diapause characterisation and seasonality of *Aedes japonicus japonicus* (Diptera, Culicidae) in the Northeast of France. *Parasite*, 28.
- Kurucz, K., Manica, M., Delucchi, L., Kemenesi, G., and Marini, G. (2020). Dynamics and distribution of the invasive mosquito *Aedes koreicus* in a temperate European city. *International journal of environmental research and public health*, 17(8):2728.
- Lacour, G., Chanaud, L., L’Ambert, G., and Hance, T. (2015). Seasonal synchronization of diapause phases in *Aedes albopictus* (Diptera: Culicidae). *PloS one*, 10(12):e0145311.



- Magori, K., Legros, M., Puente, M. E., Focks, D. A., Scott, T. W., Lloyd, A. L., and Gould, F. (2009). Skeeter Buster: A Stochastic, Spatially Explicit Modeling Tool for Studying *Aedes aegypti* Population Replacement and Population Suppression Strategies. *PLOS Neglected Tropical Diseases*, 3(9):e508.
- Marcantonio, M., Reyes, T., and Barker, C. M. (2019). Quantifying *Aedes aegypti* dispersal in space and time: a modeling approach. *Ecosphere*, 10(12):e02977.
- Marini, F., Caputo, B., Pombi, M., Travaglio, M., Montarsi, F., Drago, A., Rosà, R., Manica, M., and Torre, A. d. (2019a). Estimating Spatio-Temporal Dynamics of *Aedes albopictus* Dispersal to Guide Control Interventions in Case of Exotic Arboviruses in Temperate Regions. *Scientific Reports*, 9(1):1–9.
- Marini, G., Arnoldi, D., Baldacchino, F., Capelli, G., Guzzetta, G., Merler, S., Montarsi, F., Rizzoli, A., and Rosà, R. (2019b). First report of the influence of temperature on the bionomics and population dynamics of *Aedes koreicus*, a new invasive alien species in Europe. *Parasites & vectors*, 12(1):1–12.
- Metelmann, S., Caminade, C., Jones, A. E., Medlock, J. M., Baylis, M., and Morse, A. P. (2019). The UK’s suitability for *Aedes albopictus* in current and future climates. *Journal of The Royal Society Interface*, 16(152):20180761. Publisher: Royal Society.
- Mohammed, A. and Chadee, D. D. (2011). Effects of different temperature regimens on the development of *aedes aegypti* (L.)(diptera: Culicidae) mosquitoes. *Acta tropica*, 119(1):38–43.
- Pasaoglu, G., Fiorello, D., Martino, A., Scarcella, G., Alemanno, A., Zubaryeva, A., and Thiel, C. (2012). Driving and parking patterns of European car drivers-a mobility survey. *Luxembourg: European Commission Joint Research Centre*.
- Pasquali, S., Mariani, L., Calvitti, M., Moretti, R., Ponti, L., Chiari, M., Sperandio, G., and Gilioli, G. (2020). Development and calibration of a model for the potential establishment and impact of *Aedes albopictus* in Europe. *Acta tropica*, 202:105228.
- Poletti, P., Messeri, G., Ajelli, M., Vallorani, R., Rizzo, C., and Merler, S. (2011). Transmission potential of chikungunya virus and control measures: the case of italy. *PloS one*, 6(5):e18860.
- Reuss, F., Wieser, A., Niamir, A., Bálint, M., Kuch, U., Pfenninger, M., and Müller, R. (2018). Thermal experiments with the asian bush mosquito (*Aedes japonicus japonicus*)(Diptera: Culicidae) and implications for its distribution in Germany. *Parasites & vectors*, 11(1):1–10.

- Thomas, S. M., Obermayr, U., Fischer, D., Kreyling, J., and Beierkuhnlein, C. (2012). Low-temperature threshold for egg survival of a post-diapause and non-diapause European aedine strain, *Aedes albopictus* (Diptera: Culicidae). *Parasites & Vectors*, 5(1):100.
- Tran, A. and Demarchi, M. (2019). Arbocarto. modélisation spatiale dynamique des population d'aedes albopictus. france métropolitaine et régions d'outre-mer. rapport final, france métropolitaine.
- Tran, A., l'Amber, G., Lacour, G., Benoît, R., Demarchi, M., Cros, M., Cailly, P., Aubry-Kientz, M., Balenghien, T., and Ezanno, P. (2013). A rainfall-and temperature-driven abundance model for *Aedes albopictus* populations. *International journal of environmental research and public health*, 10(5):1698–1719.
- Tran, A., Mangeas, M., Demarchi, M., Roux, E., Degenne, P., Haramboure, M., Le Goff, G., Damiens, D., Gouagna, L.-C., Herbreteau, V., et al. (2020). Complementarity of empirical and process-based approaches to modelling mosquito population dynamics with *Aedes albopictus* as an example—application to the development of an operational mapping tool of vector populations. *PloS one*, 15(1):e0227407.
- Wieser, A., Reuss, F., Niamir, A., Müller, R., O'Hara, R. B., and Pfenninger, M. (2019). Modelling seasonal dynamics, population stability, and pest control in *Aedes japonicus japonicus* (Diptera: Culicidae). *Parasites & vectors*, 12(1):1–12.
- Yang, H., Macoris, M., Galvani, K., Andrighetti, M., and Wanderley, D. (2009). Assessing the effects of temperature on the population of aedes aegypti, the vector of dengue. *Epidemiology & Infection*, 137(8):1188–1202.
